# Supplementary material for: Pressure suppression of charge order without metallisation in Cs2Au2I6
Source: Royal Society of Chemistry journal article supplement (doi:10.1039/c0cc01708f), 2010-01-01
Supplement: c0cc01708f.pdf [file c0cc01708f.pdf]

## Electronic Supplementary Information for: 'Pressure Suppression of Charge Order without Metallisation in Cs<sub>2</sub>Au<sub>2</sub>I<sub>6</sub>' by Kesmartseva et al

Crystal structure parameters (cell parameters, atomic positions and isotropic U-factors) and the derived Au-I bond distances for Cs<sub>2</sub>Au<sub>2</sub>I<sub>6</sub> from Rietveld fits to the high pressure synchrotron X-ray diffraction data shown in Fig. 1.

| Pressure                           | 0 kbar    |              |              | 47 kbar                                    |              |              | 89 kbar                                    |              |              | 120 kbar                                   |              |              |                                            |
|------------------------------------|-----------|--------------|--------------|--------------------------------------------|--------------|--------------|--------------------------------------------|--------------|--------------|--------------------------------------------|--------------|--------------|--------------------------------------------|
|                                    | S.G.      | <i>a</i> (Å) | <i>c</i> (Å) | <i>V</i> <sub>cell</sub> (Å <sup>3</sup> ) | <i>a</i> (Å) | <i>c</i> (Å) | <i>V</i> <sub>cell</sub> (Å <sup>3</sup> ) | <i>a</i> (Å) | <i>c</i> (Å) | <i>V</i> <sub>cell</sub> (Å <sup>3</sup> ) | <i>a</i> (Å) | <i>c</i> (Å) | <i>V</i> <sub>cell</sub> (Å <sup>3</sup> ) |
|                                    |           | 8.2831(6)    | 12.0929(9)   | 207.42(2)                                  | 7.973(3)     | 11.577(5)    | 184.0(1)                                   | 8.003(2)     | 10.840(3)    | 173.6(1)                                   | 5.483(1)     | 5.670(2)     | 5.339(15)                                  |
|                                    |           |              |              |                                            |              |              |                                            |              |              |                                            |              |              |                                            |
| Au 1                               | 0         | 0            | 0            | 0                                          | 0            | 0            | 0                                          | 0            | 0            | 0                                          | 0            | 0            | 0                                          |
| U <sub>iso</sub> (Å <sup>2</sup> ) |           | 0.002(3)     |              | 0.003(4)                                   |              |              |                                            | 0.005(4)     |              |                                            | 0.005(4)     |              | 0.01(1)                                    |
| Au 2                               | ½         | ½            | 0            | ½                                          | ½            | 0            | ½                                          | ½            | 0            | ½                                          | ½            | 0            | ½                                          |
| U <sub>iso</sub> (Å <sup>2</sup> ) |           | 0.002        |              | 0.003                                      |              |              |                                            | 0.005        |              |                                            | 0.005        |              | 0.005(1)                                   |
| I 1                                | 0.2276(9) | 0.2276(9)    | 0            | 0.228(3)                                   | 0.228(3)     | 0            | 0.230(2)                                   | 0.230(2)     | 0            | ½                                          | 0            | 0            | ½                                          |
| U <sub>iso</sub> (Å <sup>2</sup> ) |           | 0.014(5)     |              | 0.004(5)                                   |              |              |                                            | 0.053(10)    |              |                                            | 0.016(7)     |              | 0.00(1)                                    |
| I 2                                | ½         | ½            | 0.219(2)     | ½                                          | ½            | 0.218(3)     | ½                                          | ½            | 0.221(3)     | 0                                          | 0            | ½            | 0                                          |
| U <sub>iso</sub> (Å <sup>2</sup> ) |           | 0.088(9)     |              | 0.004                                      |              |              |                                            | 0.053        |              |                                            | 0.016        |              | 0.00                                       |
| Cs                                 | 0         | ½            | ¼            | 0                                          | ½            | ¼            | 0                                          | ½            | ¼            | ½                                          | ½            | ½            | ½                                          |
| U <sub>iso</sub> (Å <sup>2</sup> ) |           | 0.043(5)     |              | 0.044(10)                                  |              |              |                                            | 0.075(5)     |              |                                            | 0.075        |              | 0.11(1)                                    |

| Bond distances (Å)     | 0 kbar    |    | 47 kbar   |    | 89 kbar  |    | 120 kbar |         |
|------------------------|-----------|----|-----------|----|----------|----|----------|---------|
|                        | x4        | x2 | x4        | x2 | x4       | x2 | x4       | x2      |
| Au1-I1                 | 2.666(7)  |    | 2.57(2)   |    | 2.70(6)  |    | 2.741(1) |         |
| Au1-I2                 | 3.39(2)   |    | 3.25(3)   |    | 2.99(9)  |    | 2.794(1) |         |
| <Au <sup>I</sup> -I>   | 2.907(15) |    | 2.797(36) |    | 2.80(10) |    | 2.758(2) |         |
| <Au <sup>II</sup> -I>  |           |    |           |    |          |    |          | 2.70(1) |
| Au2-I1                 | 3.191(7)  |    | 3.07(2)   |    | 2.97(6)  |    |          |         |
| Au2-I2                 | 2.62(2)   |    | 2.54(3)   |    | 2.45(9)  |    |          |         |
| <Au <sup>III</sup> -I> | 3.011(17) |    | 2.893(35) |    | 2.80(10) |    |          |         |
